# Supplementary material
Source: PubMed Central journal article supplement (PMC9979676)
Supplement: boe-14-2-608-s001.pdf [file boe-14-2-608-s001.pdf]

## Estimation of the full shape of the crystalline lens *in-vivo* from OCT images using *eigenlenses*: supplement

**EDUARDO MARTÍNEZ-ENRÍQUEZ,<sup>1,\*</sup>  ANDREA CURATOLO,<sup>1,2,3</sup>   
ALBERTO DE CASTRO,<sup>1</sup>  JUDITH S. BIRKENFELD,<sup>1</sup> ANA M.  
GONZÁLEZ,<sup>1</sup> ASHIK MOHAMED,<sup>4,5</sup>  MARCO RUGGERI,<sup>6,7</sup>  FABRICE  
MANN,<sup>6,7</sup> ZVIETCOVICH FERNANDO,<sup>1</sup> AND SUSANA MARCOS<sup>1,8</sup> **

<sup>1</sup>*Instituto de Óptica, Consejo Superior de Investigaciones Científicas, Madrid, Madrid, Spain*

<sup>2</sup>*Institute of Physical Chemistry, Polish Academy of Sciences (IChF-PAN), Warsaw, Poland*

<sup>3</sup>*International Centre for Translational Eye Research (ICTER), Warsaw, Poland*

<sup>4</sup>*Ophthalmic Biophysics, LV Prasad Eye Institute, Hyderabad, Telangana, India*

<sup>5</sup>*Brien Holden Vision Institute, Sydney, NSW, Australia*

<sup>6</sup>*Ophthalmic Biophysics Center, Bascom Palmer Eye Institute, University of Miami School of Medicine, Miami, FL, USA*

<sup>7</sup>*Department of Biomedical Engineering, University of Miami College of Engineering, Coral Gables, FL, USA*

<sup>8</sup>*Center for Visual Science. The Institute of Optics. Flaum Eye Institute, University of Rochester, Rochester, NY, USA*

\*[eduardo.martinez@io.cfmac.csic.es](mailto:eduardo.martinez@io.cfmac.csic.es)

---

This supplement published with Optica Publishing Group on 5 January 2023 by The Authors under the terms of the [Creative Commons Attribution 4.0 License](https://creativecommons.org/licenses/by/4.0/) in the format provided by the authors and unedited. Further distribution of this work must maintain attribution to the author(s) and the published article's title, journal citation, and DOI.

Supplement DOI: <https://doi.org/10.6084/m9.figshare.21641690>

Parent Article DOI: <https://doi.org/10.1364/BOE.477557>

# Estimation of the full shape of the crystalline lens *in-vivo* from optical coherence tomography images using *eigenlenses*: supplemental document

**Eigenlenses and eigencenters.** Figure S1 shows an example of the construction of an *ex-vivo* lens of age 65 y/o with *eigenlenses* [1].

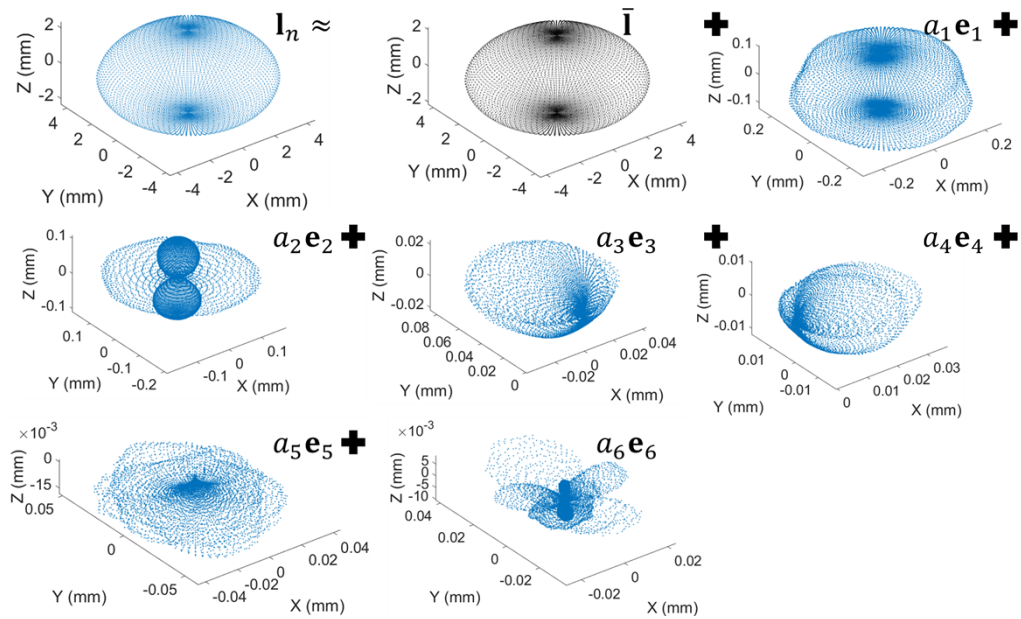

Fig. S1. Example of the construction of the first training *ex-vivo* lens (age 65 y/o) with eigenlenses, obtained as  $\mathbf{l}_1 \approx \bar{\mathbf{l}} + \sum_{k=1}^6 a_k \mathbf{e}_k$ . In this lens  $a_1 = -17.6$ ,  $a_2 = 10$ ,  $a_3 = -2.5$ ,  $a_4 = -1.1$ ,  $a_5 = -2.3$ , and  $a_6 = 1.0$ .

**Pupil diameter analysis.** Figure S2 shows the  $\hat{a}_k$  coefficients and the geometrical parameters (DIA, VOL, LSA and EPP) estimated with the proposed *eigenlenses* method as a function of the pupil diameter (PD) from which the estimation of the full lens shape is obtained ( $n=17$  subjects at 0 D of accommodation). We investigated coefficients and parameters for PDs between 3.4 to 6.5 mm.

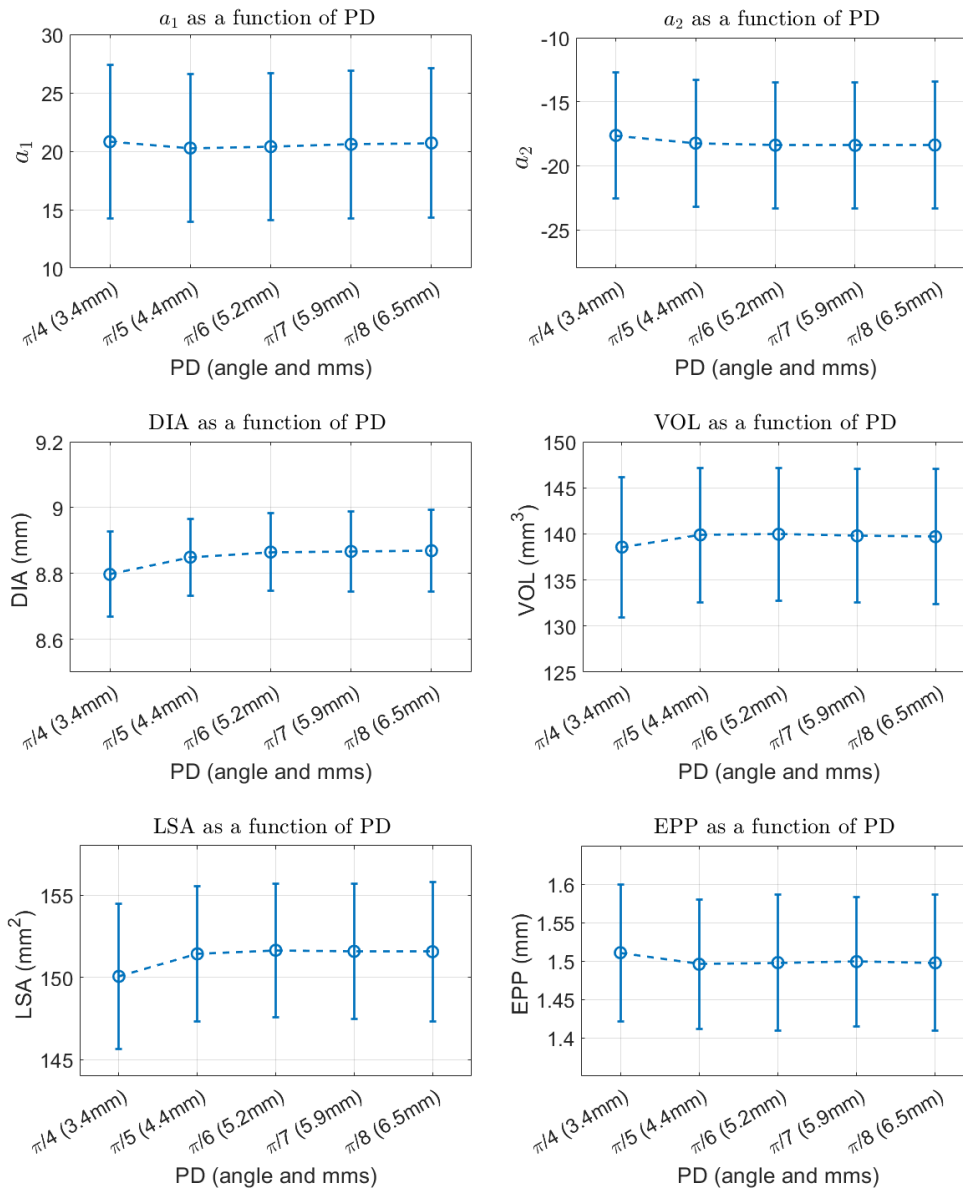

Fig. S2.  $\hat{a}_1$ ,  $\hat{a}_2$ , DIA, VOL, LSA and EPP calculated as a function of the pupil diameter (PD) from which the full shape estimation was obtained.

## References

- [1] E. Martinez-Enriquez, A. de Castro, and S. Marcos, "Eigenlenses: a new model for full crystalline lens shape representation and its applications," *Biomed Opt Express*, vol. 11, pp. 5633-5649, Oct 1 2020.
